# Supplementary material for: A strong ‘filter’ effect of the East China Sea land bridge for East Asia’s temperate plant species: inferences from molecular phylogeography and ecological niche modelling of Platycrater arguta (Hydrangeaceae)
Source: PubMed Central journal article supplement (PMC4015774; doi:10.1186/1471-2148-14-41), 2014-03-04

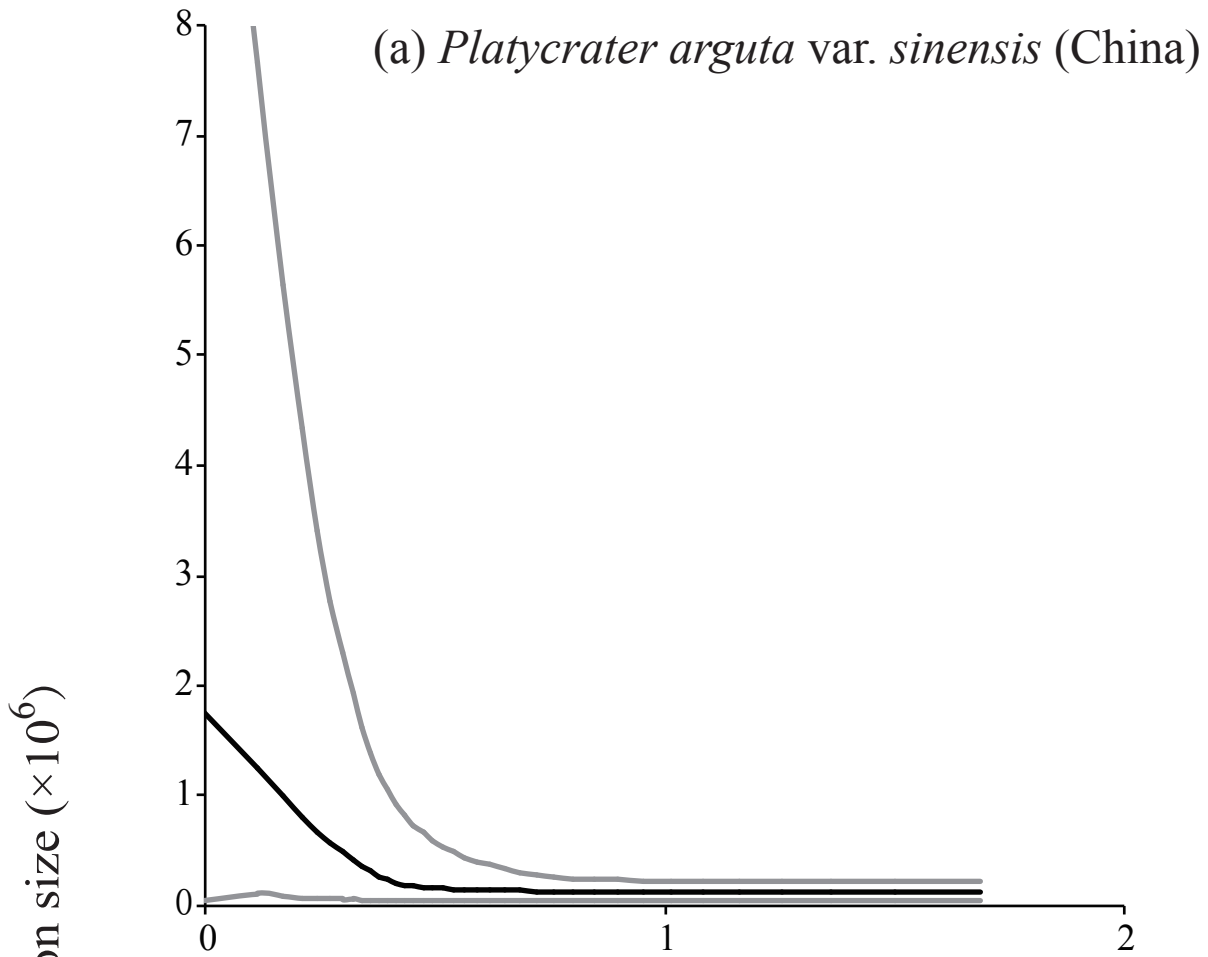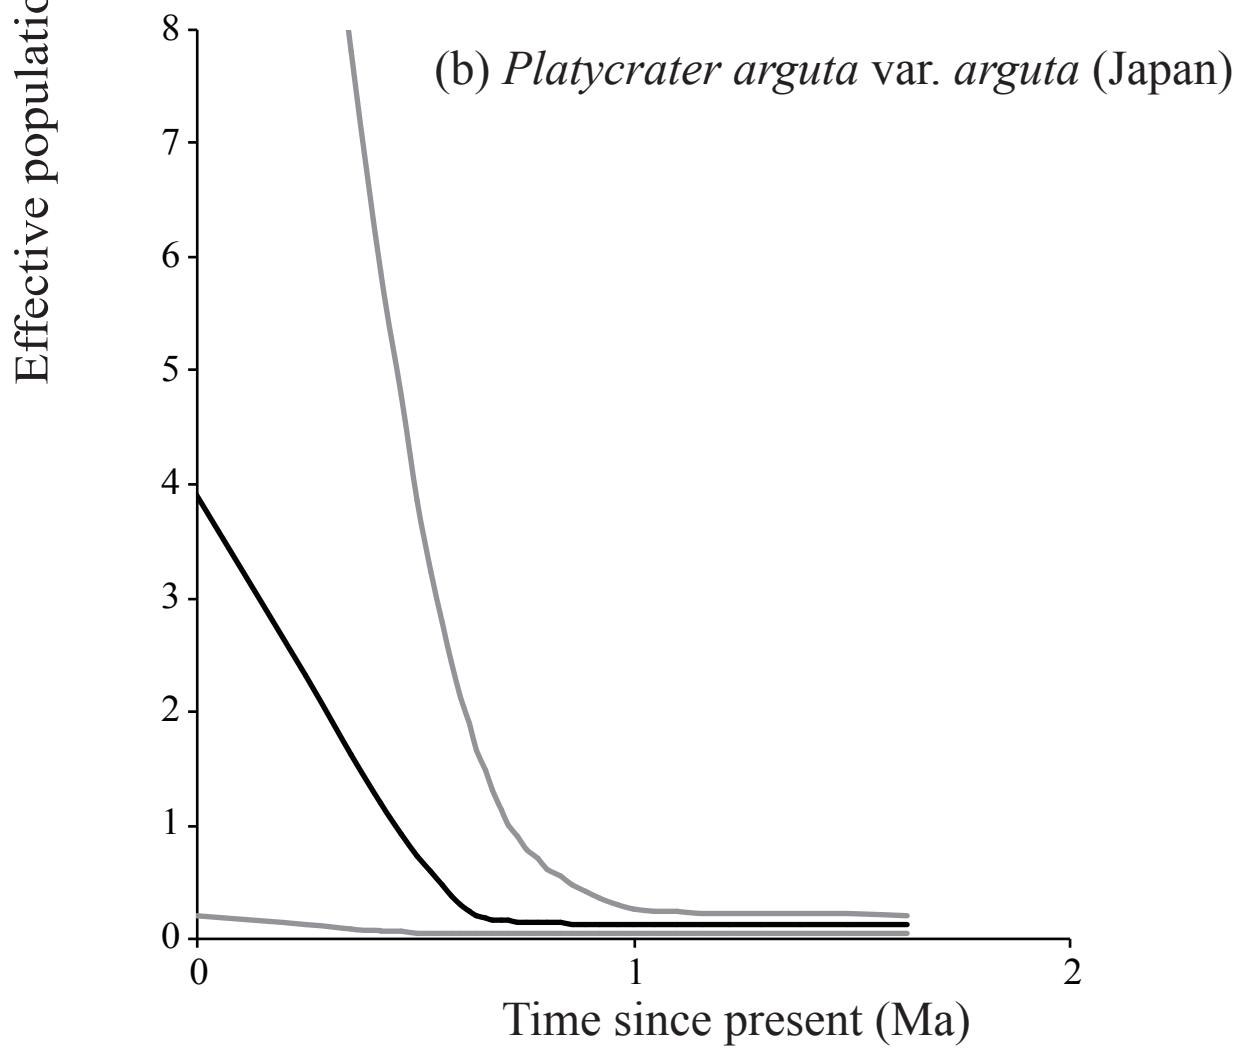

Supplement: 1471-2148-14-41-S10.pdf [file 1471-2148-14-41-S10.pdf]
